# Supplementary material for: Peroxiredoxin activity is a major landmark of male fertility
Source: PubMed Central journal article supplement (PMC5719347; doi:10.1038/s41598-017-17488-7), 2017-12-07

**Supplemental Materials**

**Peroxiredoxin activity is a major landmark of male fertility**

Do-Yeal Ryu, Ki-Uk Kim, Woo-Sung Kwon, Md Saidur Rahman, Amena Khatun, and  
Myung-Geol Pang\*

Department of Animal Science & Technology, Chung-Ang University, Anseong, Gyeonggi-Do  
456-756, Korea

\*Correspondence *E-mail*: [mgpang@cau.ac.kr](mailto:mgpang@cau.ac.kr); Tel: +82.31.670.4841; Fax: +82.31.675.9001

**Fig. S1. Uncropped images of western blotting.**

**Figure 1C**

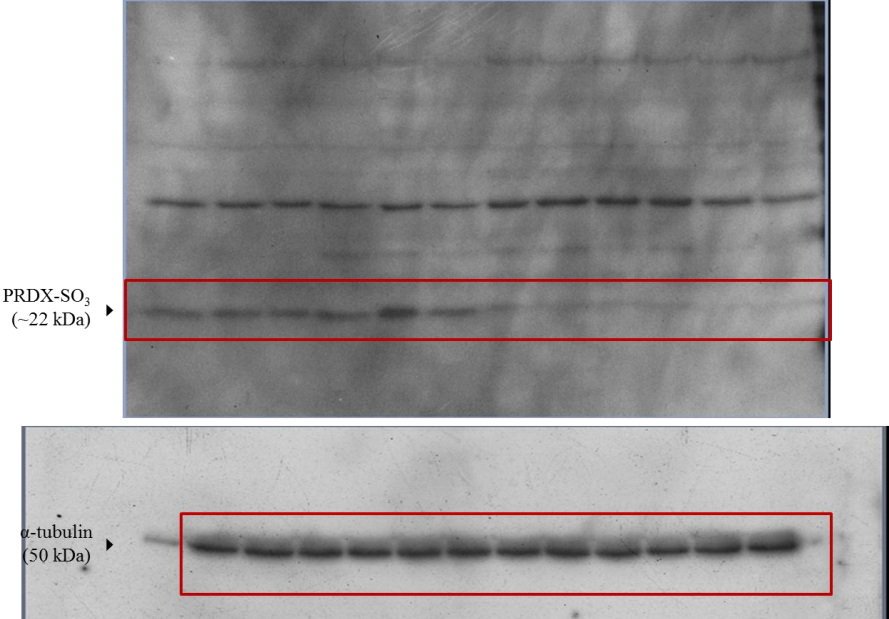

**Figure 1D**

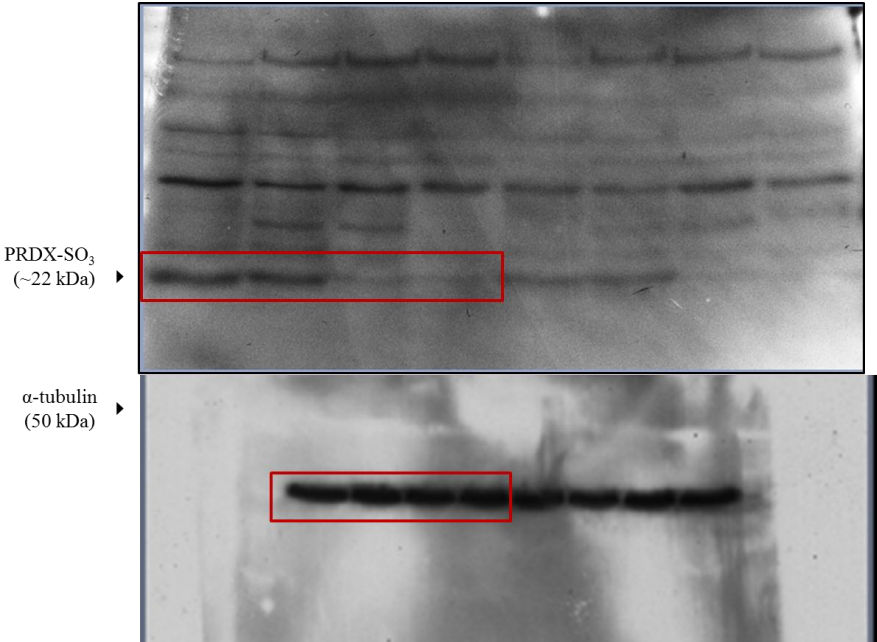

Figure 6B

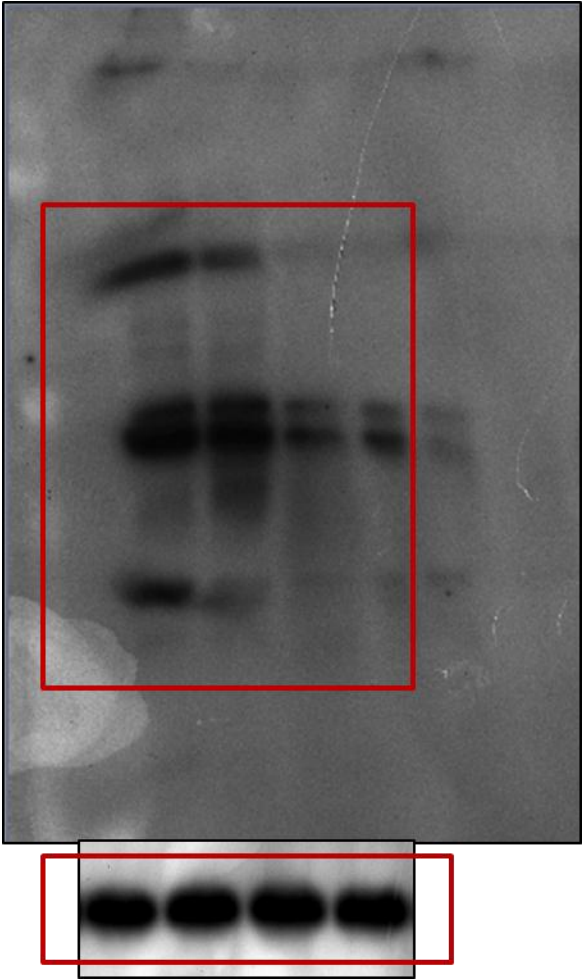

Figure 6D

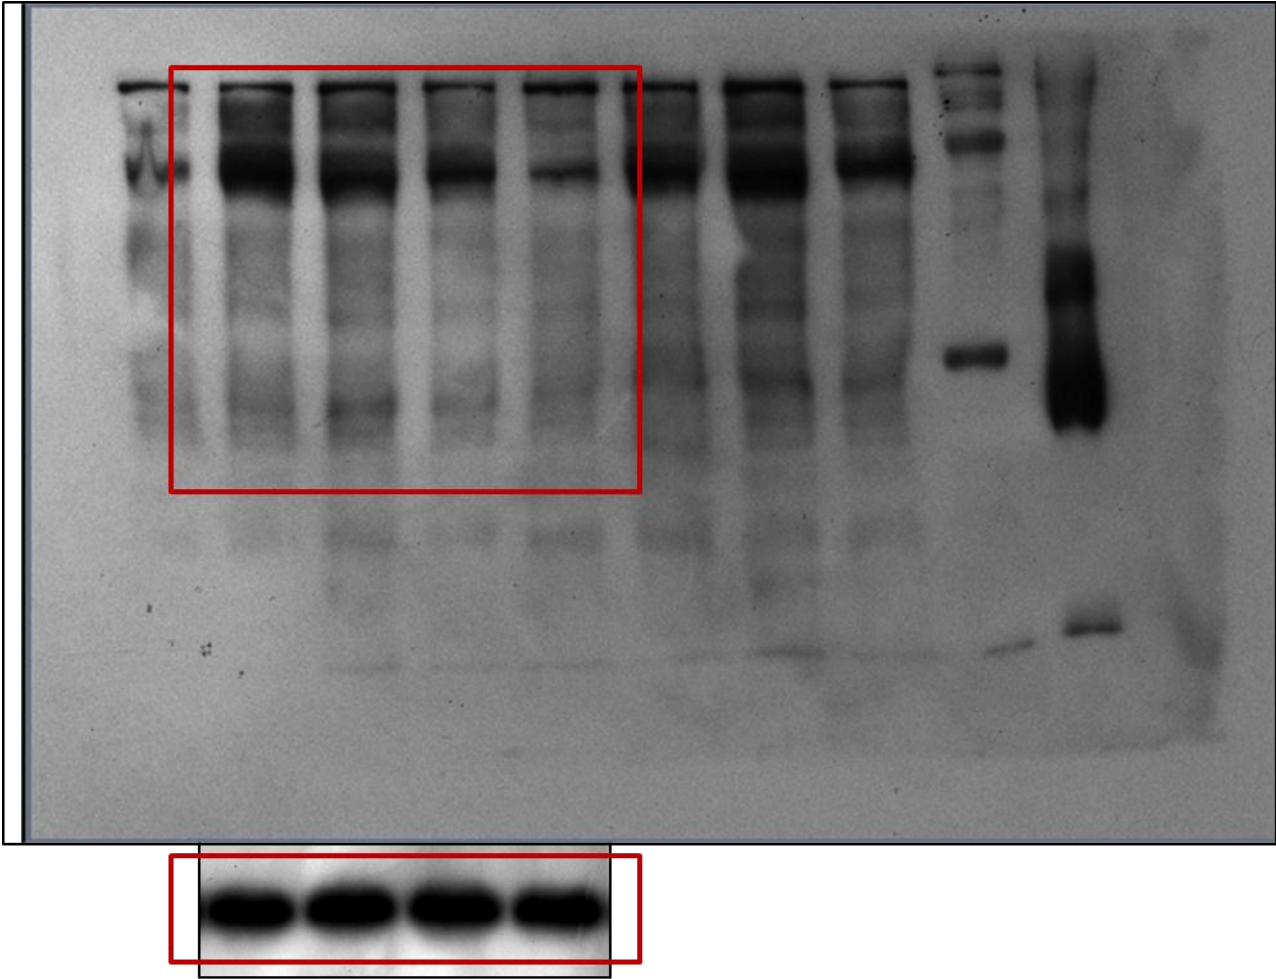

Supplement: 41598_2017_17488_MOESM1_ESM.pdf [file 41598_2017_17488_MOESM1_ESM.pdf]
